# Supplementary material
Source: MDPI journal article supplement (https://www.mdpi.com/2071-1050/16/1/76)

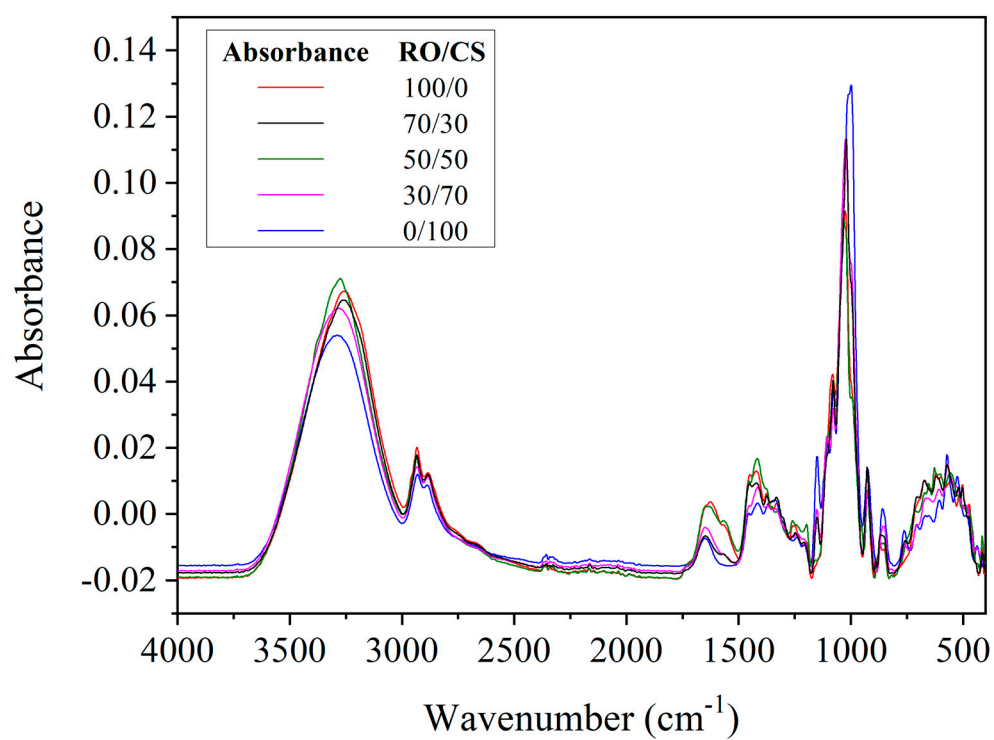

**Supplementary Figure S1.** FTIR for all RO/CS biocomposites (RO/CS ratios: 100/0, 70/30, 50/50, 30/70 and 0/100).

Supplement: s1 [file s1]
